# Supplementary material for: Identification of the Factor That Leads Human Mesenchymal Stem Cell Lines into Decellularized Bone
Source: MDPI journal article supplement (doi:10.3390/bioengineering9100490), 2022-09-21
Supplement: s1 [file s1]

**A** Empty DCB

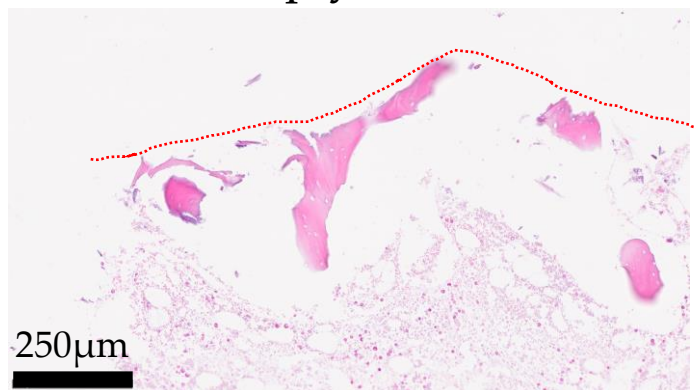

**B** UE7T-9 Cell

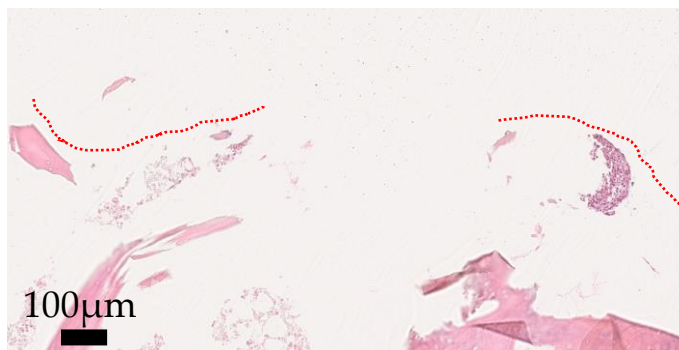

**C** HEK293T SAM library

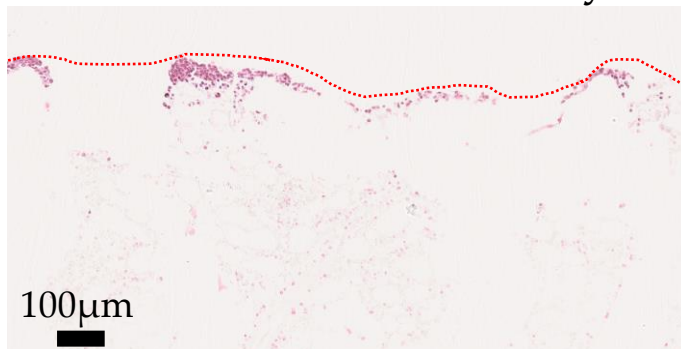

## Supplementary Figure S2

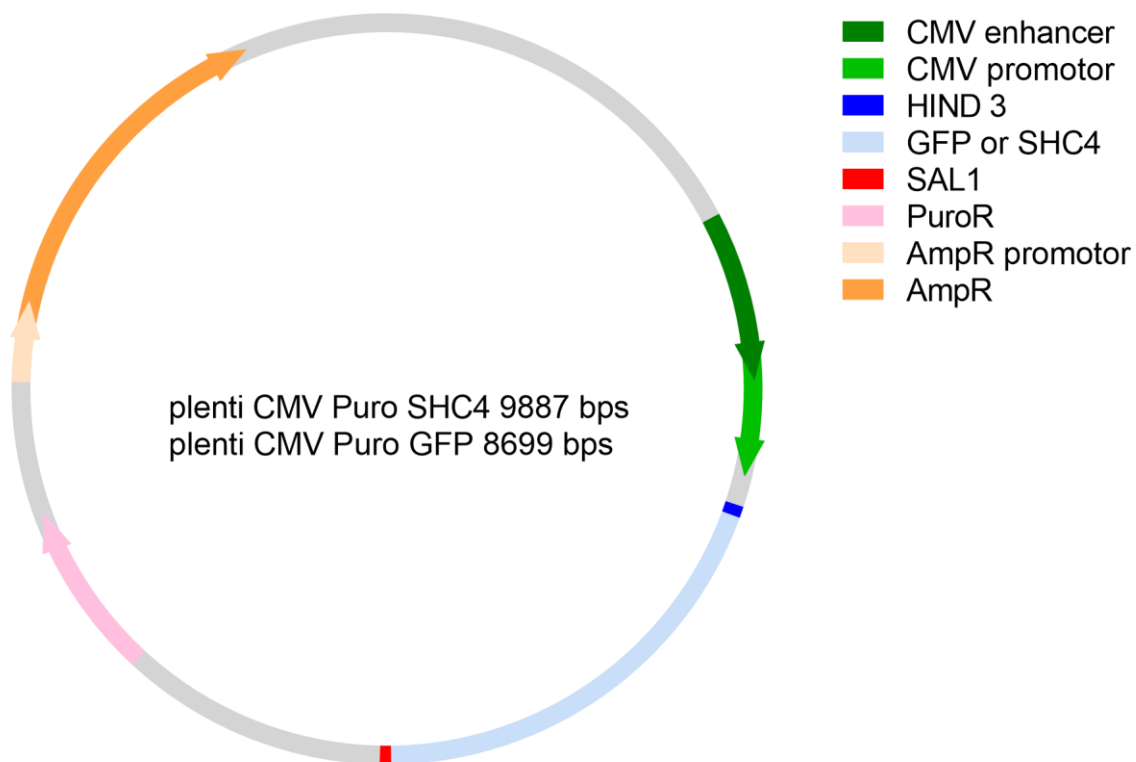

Supplementary Figure S3

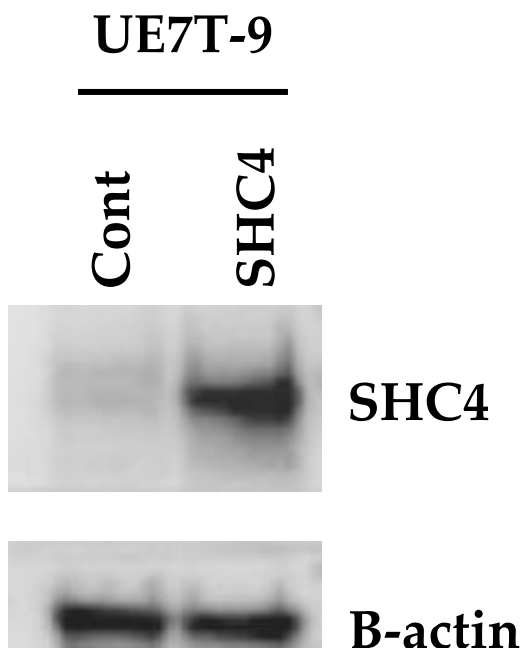

## Supplementary Figure S4

A

UE7T-9 cells

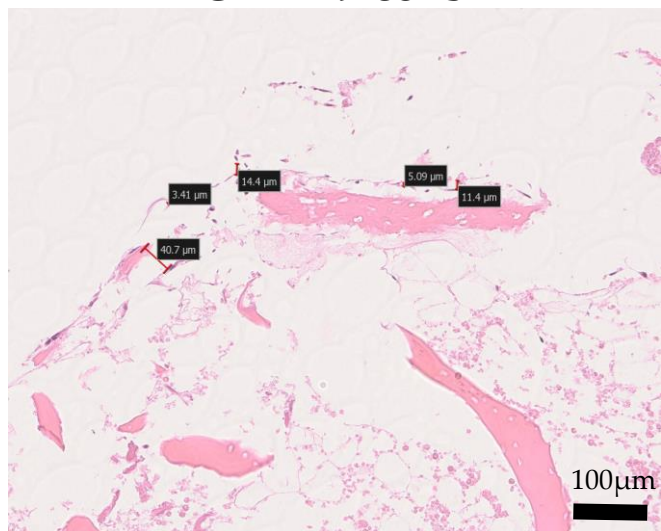

B

UE7T-9 SHC4

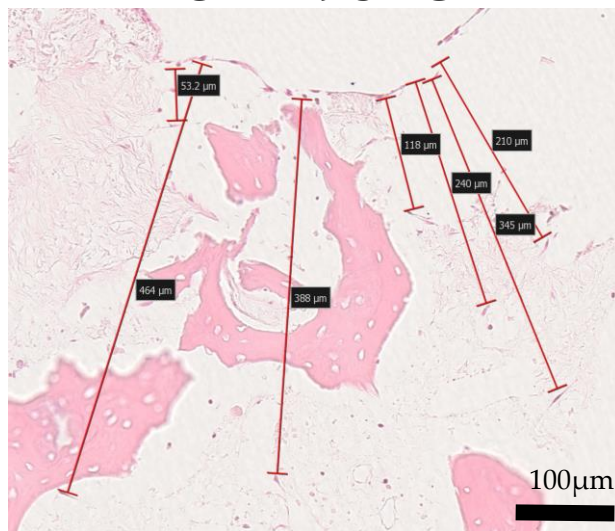

## Supplementary Figure S5

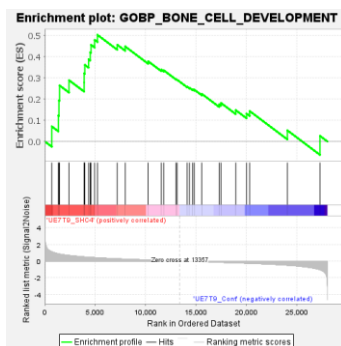

NOM p-value = 0.0  
FDR q-value = 0.10485437

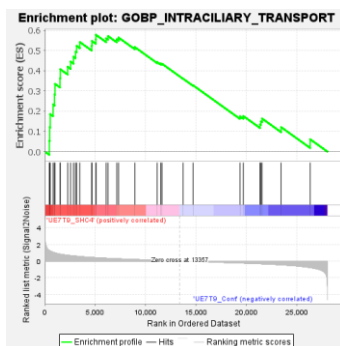

NOM p-value = 0.0  
FDR q-value = 0.0945674

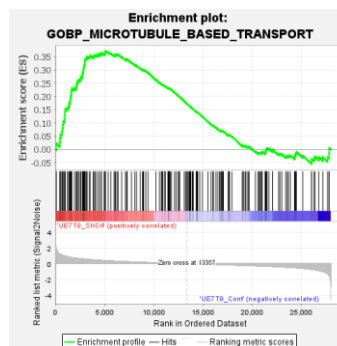

NOM p-value = 0.0  
FDR q-value = 0.11875

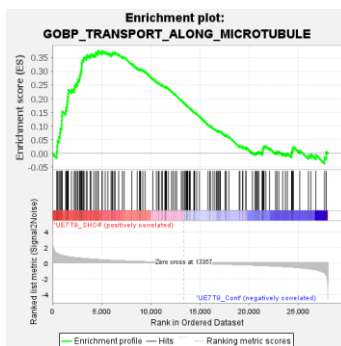

NOM p-value = 0.0  
FDR q-value = 0.10810811

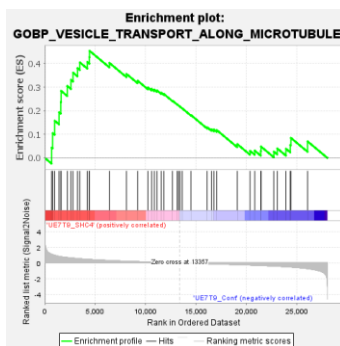

NOM p-value = 0.0  
FDR q-value = 0.086065575

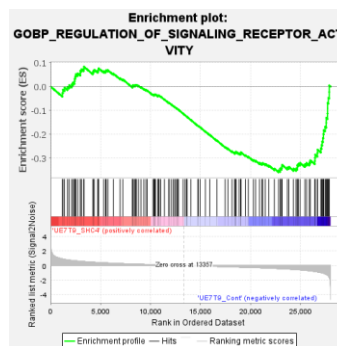

NOM p-value = 0.0  
FDR q-value = 0.0945674

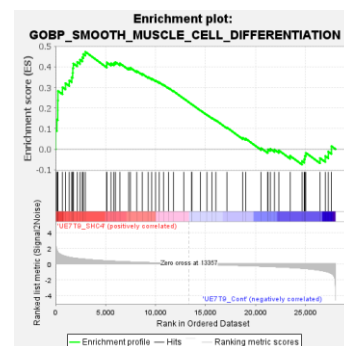

NOM p-value = 0.0  
FDR q-value = 0.08634538

## Supplementary Table S1

| GOID       | Description                                          | GeneRatio | BgRatio   | pvalue   | padj     | Count |
|------------|------------------------------------------------------|-----------|-----------|----------|----------|-------|
| GO:0097529 | myeloid leukocyte migration                          | 18/282    | 145/14579 | 3.85E-10 | 1.29E-06 | 18    |
| GO:0010469 | regulation of signaling receptor activity            | 28/282    | 397/14579 | 3.51E-09 | 3.34E-06 | 28    |
| GO:1990266 | neutrophil migration                                 | 13/282    | 80/14579  | 3.99E-09 | 3.34E-06 | 13    |
| GO:0097530 | granulocyte migration                                | 14/282    | 97/14579  | 4.95E-09 | 3.34E-06 | 14    |
| GO:0060326 | cell chemotaxis                                      | 20/282    | 215/14579 | 6.86E-09 | 3.34E-06 | 20    |
| GO:0050921 | positive regulation of chemotaxis                    | 15/282    | 117/14579 | 7.38E-09 | 3.34E-06 | 15    |
| GO:0030593 | neutrophil chemotaxis                                | 12/282    | 70/14579  | 8.51E-09 | 3.34E-06 | 12    |
| GO:0071621 | granulocyte chemotaxis                               | 13/282    | 85/14579  | 8.58E-09 | 3.34E-06 | 13    |
| GO:0050920 | regulation of chemotaxis                             | 18/282    | 176/14579 | 8.98E-09 | 3.34E-06 | 18    |
| GO:0032103 | positive regulation of response to external stimulus | 20/282    | 241/14579 | 4.74E-08 | 1.59E-05 | 20    |
| GO:0071622 | regulation of granulocyte chemotaxis                 | 9/282     | 41/14579  | 6.80E-08 | 2.07E-05 | 9     |
| GO:0030595 | leukocyte chemotaxis                                 | 16/282    | 161/14579 | 9.16E-08 | 2.55E-05 | 16    |
| GO:0030335 | positive regulation of cell migration                | 26/282    | 426/14579 | 2.36E-07 | 6.08E-05 | 26    |
| GO:0002688 | regulation of leukocyte chemotaxis                   | 12/282    | 95/14579  | 2.84E-07 | 6.80E-05 | 12    |
| GO:0008015 | blood circulation                                    | 26/282    | 436/14579 | 3.70E-07 | 7.84E-05 | 26    |
| GO:0003013 | circulatory system process                           | 26/282    | 438/14579 | 4.04E-07 | 7.84E-05 | 26    |
| GO:0040017 | positive regulation of locomotion                    | 27/282    | 468/14579 | 4.20E-07 | 7.84E-05 | 27    |
| GO:2000147 | positive regulation of cell motility                 | 26/282    | 439/14579 | 4.22E-07 | 7.84E-05 | 26    |
| GO:0050900 | leukocyte migration                                  | 22/282    | 335/14579 | 6.12E-07 | 0.000108 | 22    |

# Supplementary Table S2

| NAME   | SYMBOL    | TITLE | RANK IN GENE LIST | RANK METRIC SCORE | RUNNING ES   | CORE ENRICHMENT |
|--------|-----------|-------|-------------------|-------------------|--------------|-----------------|
| row_0  | MIR27B    | na    | 80                | 2.006150484       | 0.0784945    | Yes             |
| row_1  | JCAD      | na    | 523               | 1.201081514       | 0.11138476   | Yes             |
| row_2  | STAT5A    | na    | 526               | 1.199920297       | 0.15997483   | Yes             |
| row_3  | THBS1     | na    | 537               | 1.194373012       | 0.20805363   | Yes             |
| row_4  | CD40      | na    | 1440              | 0.842455328       | 0.20993747   | Yes             |
| row_5  | FGF18     | na    | 2077              | 0.720758319       | 0.21640572   | Yes             |
| row_6  | PDGFB     | na    | 2671              | 0.637656808       | 0.22104277   | Yes             |
| row_7  | PRKD1     | na    | 2750              | 0.628588557       | 0.24374309   | Yes             |
| row_8  | HSPB1     | na    | 2992              | 0.600527883       | 0.25947192   | Yes             |
| row_9  | MAP3K3    | na    | 3473              | 0.543644011       | 0.26434046   | Yes             |
| row_10 | MIR10B    | na    | 3793              | 0.509561718       | 0.27358878   | Yes             |
| row_11 | FGFR1     | na    | 4217              | 0.470974565       | 0.2775502    | Yes             |
| row_12 | ATP5F1A   | na    | 4856              | 0.420867354       | 0.27178508   | Yes             |
| row_13 | TMSB4X    | na    | 4890              | 0.419208437       | 0.28760466   | Yes             |
| row_14 | RHOJ      | na    | 5106              | 0.401287049       | 0.29618397   | Yes             |
| row_15 | HDAC7     | na    | 5159              | 0.397529751       | 0.3104444    | Yes             |
| row_16 | PLCG1     | na    | 6913              | 0.288059354       | 0.2593893    | No              |
| row_17 | AKT3      | na    | 7009              | 0.282970339       | 0.267465     | No              |
| row_18 | SP1       | na    | 7082              | 0.278080672       | 0.27616554   | No              |
| row_19 | PLK2      | na    | 7236              | 0.268707573       | 0.2815871    | No              |
| row_20 | CIB1      | na    | 8085              | 0.229117215       | 0.26053014   | No              |
| row_21 | HMOX1     | na    | 8475              | 0.212350413       | 0.25522014   | No              |
| row_22 | ETS1      | na    | 8488              | 0.211902097       | 0.26338416   | No              |
| row_23 | HDAC9     | na    | 8731              | 0.200153291       | 0.2628404    | No              |
| row_24 | FOXC2     | na    | 9806              | 0.151230082       | 0.23053662   | No              |
| row_25 | MIRLET7F1 | na    | 9829              | 0.150917947       | 0.23586962   | No              |
| row_26 | VEGFC     | na    | 11753             | 0.069871381       | 0.16988206   | No              |
| row_27 | NFE2L2    | na    | 12017             | 0.059476808       | 0.16288173   | No              |
| row_28 | NRP1      | na    | 12410             | 0.045382153       | 0.1506931    | No              |
| row_29 | MIR221    | na    | 13591             | -0.009490869      | 0.108847655  | No              |
| row_30 | HIF1A     | na    | 13602             | -0.009789514      | 0.10888678   | No              |
| row_31 | AKT1      | na    | 13806             | -0.020414256      | 0.10244961   | No              |
| row_32 | NOS3      | na    | 14773             | -0.048365697      | 0.06983942   | No              |
| row_33 | MAPK14    | na    | 14806             | -0.049554404      | 0.07070383   | No              |
| row_34 | TGFB1     | na    | 14889             | -0.052395739      | 0.06989403   | No              |
| row_35 | P2RX4     | na    | 15316             | -0.067835391      | 0.05739917   | No              |
| row_36 | VEGFA     | na    | 15646             | -0.080824926      | 0.048902556  | No              |
| row_37 | PRKCA     | na    | 16392             | -0.105386086      | 0.026514018  | No              |
| row_38 | ANGPT1    | na    | 17236             | -0.141899601      | 0.002098987  | No              |
| row_39 | HMGB1     | na    | 18763             | -0.20597811       | -0.04416089  | No              |
| row_40 | ATP5F1B   | na    | 19150             | -0.221499115      | -0.04899253  | No              |
| row_41 | NUS1      | na    | 19914             | -0.252773672      | -0.06604809  | No              |
| row_42 | ABL1      | na    | 20104             | -0.260890752      | -0.06223192  | No              |
| row_43 | PDPK1     | na    | 21219             | -0.316465229      | -0.08926627  | No              |
| row_44 | MIR210    | na    | 21709             | -0.343527526      | -0.09283537  | No              |
| row_45 | SIRT1     | na    | 21890             | -0.353086591      | -0.08495819  | No              |
| row_46 | MAP2K3    | na    | 22056             | -0.362186193      | -0.07617515  | No              |
| row_47 | ADAM17    | na    | 22381             | -0.383765727      | -0.07220734  | No              |
| row_48 | GATA2     | na    | 22406             | -0.385374069      | -0.05743777  | No              |
| row_49 | PTGS2     | na    | 23283             | -0.441656172      | -0.07087747  | No              |
| row_50 | PIK3C2A   | na    | 24041             | -0.499452233      | -0.07771449  | No              |
| row_51 | ANGPT4    | na    | 25187             | -0.616642952      | -0.093684845 | No              |
| row_52 | PRKD2     | na    | 25286             | -0.628580928      | -0.071700595 | No              |
| row_53 | FGF2      | na    | 25834             | -0.701947331      | -0.06281004  | No              |
| row_54 | ANXA1     | na    | 25931             | -0.716482401      | -0.03718945  | No              |
| row_55 | KDR       | na    | 27411             | -1.101939321      | -0.0454324   | No              |
| row_56 | SRPX2     | na    | 27877             | -1.637428403      | 0.004330372  | No              |
